# Supplementary material
Source: publisher site journal article supplement (https://www.dovepress.com/article/497754)
Supplement: Supplementary file 1 [file get_supplementary_file.php]

# Supplementary Material

## Table S1 Univariate logistic regression analysis for functional outcome

| **Variables** | **Crude OR, 95%CI** | ***p*-value** |
| --- | --- | --- |
| Age (year) | 1.008 (0.994~1.021) | 0.2674 |
| Male | 1.267 (0.918~1.748) | 0.1493 |
| Former and Current smoking | 0.985 (0.672~1.443) | 0.9382 |
| hypertension | 0.954 (0.685~1.329) | 0.7812 |
| Diabetes mellitus | 1.402 (0.892~2.203) | 0.1427 |
| Coronary artery disease | 1.531 (1.037~2.259) | 0.0321 |
| Hyperlipemia | 2.134 (1.414~3.221) | <0.001 |
| Atrial fibrillation | 1.253 (0.909~1.729) | 0.1690 |
| Temperature (degree C) | 1.049 (0.761~1.445) | 0.7718 |
| Systolic BP (mmHg) | 1.002 (0.996~1.008) | 0.5697 |
| Diastolic BP (mmHg) | 0.996 (0.982~1.009) | 0.5177 |
| Time of Last known well to reperfusion  ≤6h VS. >6h | 0.925 (0.487~1.759) | 0.8126 |
| ASPECTS (score) | 0.851 (0.728~0.995) | 0.0434 |
| Baseline NIHSS (score) | 1.145 (1.1~1.193) | <0.001 |
| Non-Cardioembolic stroke | 0.743 (0.538~1.026) | 0.0709 |
| hsCRP (mg/L) | 1.007 (0.994~1.02) | 0.2845 |
| Albumin (g/L) | 0.974 (0.938~1.01) | 0.1552 |
| END | 3.766 (2.57~5.52) | <0.001 |
| IVT+MT VS. MT | 0.615 (0.428~0.883) | 0.0085 |
| Middle cerebral artery VS. ICA occlusion | 0.631 (0.414~0.962) | 0.0325 |
| Anterior cerebral artery VS. ICA occlusion | 0.308 (0.154~0.615) | <0.001 |
| VA and/or BA VS. ICA occlusion | 0.692 (0.408~1.173) | 0.1718 |
| WBC (×109/L) | 1.005 (0.977~1.034) | 0.7278 |
| Lymphocytes (×109/L) | 0.654 (0.547~0.782) | <0.001 |
| Neutrophils (×109/L) | 1.018 (0.986~1.051) | 0.2688 |
| Platelets (×109/L) | 1.003 (1~1.006) | 0.0765 |
| Monocytes (×109/L) | 2.222 (1.26~3.919) | 0.0058 |
| NLR | 1.12 (1.07~1.173) | <0.001 |
| MLR | 1.799 (1.289~2.512) | <0.001 |
| PLR | 1.001 (1~1.002) | 0.1094 |
| SII | 1.001 (1~1.001) | <0.001 |
| SIRI | 1.249 (1.156~1.349) | <0.001 |

**Notes:** Crude model: no other covariates were adjusted. Values in parentheses represent percentage of patients (%); brackets represent first and third quartiles, respectively.

**Abbreviations:** ASPECTS, Alberta Stroke Program Early Computed Tomography Score; BA, basilar artery; BP, blood pressure; END, early neurological deterioration; MT, mechanical thrombectomy; hsCRP, high sensitivity C reactive protein; IVT, intravenous thrombolysis; MLR, monocyte-to-lymphocyte ratio; mRS, modified Rankin Scale; NIHSS, National Institutes of Health Stroke Scale; NLR, Neutrophil-to-lymphocyte ratio; PLR, platelet-to-lymphocyte ratio; SII, systemic immune inflammation index; SIRI, systemic inflammation response index; WBC, white blood cell; VA, vertebral artery.

Table S2 Diagnostic Values of Various Biomarkers

|  | **AUC**  **(95% CI)** | **Cut-off** | **Specificity** | **Sensitivity** | **NPV** | **PPV** | **Accuracy** |
| --- | --- | --- | --- | --- | --- | --- | --- |
| SIRI | 68.19%  (63.91% ~ 72.49%) | 3.31 | 62.68% | 69.51% | 63.37% | 68.88% | 66.39% |
| SII | 63.76%  (59.31% ~ 68.21%) | 1013.36 | 48.19% | 74.39% | 61.29% | 63.05% | 62.42% |
| NLR | 63.01%  (58.53% ~ 67.49%) | 5.28 | 53.26% | 68.29% | 58.57% | 63.46% | 61.42% |
| MLR | 61.49%  (56.97% ~ 66.01%) | 0.31 | 40.22% | 80.18% | 63.07% | 61.45% | 61.92% |
| PLR | 60.60%  (56.00% ~ 65.20%) | 101.06 | 35.14% | 86.28% | 68.31% | 61.26% | 62.91% |
| WBC | 52.46%  (47.81% ~ 57.10%) | 4.82 | 11.23% | 95.43% | 67.39% | 56.09% | 56.95% |
| NIHSS | 72.67%  (68.66% ~ 76.67%) | 15.5 | 73.91% | 59.76% | 60.71% | 73.13% | 66.23% |

**Notes:** Results are presented as %.

**Abbreviations:** AUC, area under the curve; NPV, negative predictive value; PPV, positive predictive value; SIRI, systemic inflammation response index; NLR, neutrophil-to-lymphocyte ratio; MLR, monocyte-to-lymphocyte ratio; PLR, platelet-to-lymphocyte ratio; SII, systemic immune inflammation index; NIHSS, National Institutes of Health Stroke Scale; 95% CI, 95% confidence interval.
